# Supplementary material
Source: publisher figshare collection journal article supplement (https://karger.figshare.com/ndownloader/files/14606006)
Supplement: Supplementary file 1 [file 14606006]

**Supplementary Table 4.** Characteristics of neuron profiles in the rostral dorsal peduncular nucleus.

| PARAMETER | ANTIBODY | |
| --- | --- | --- |
| Area (µm2) | PV | GAD |
| Number | 25 | 25 |
| Mean | 117.13 | 117.21 |
| Standard deviation | 32.16 | 44.65 |
| Range | 51.21-170.87 | 59.93-263.70 |
| Perimeter (µm) |  |  |
| Number | 25 | 25 |
| Mean | 44.65 | 44.54 |
| Standard deviation | 6.34 | 6.96 |
| Range | 31.28-54.33 | 33.19-63.19 |
| Length (µm) |  |  |
| Number | 25 | 25 |
| Mean | 15.40 | 15.19 |
| Standard deviation | 2.52 | 2.34 |
| Range | 10.67-20.95 | 10.91-19.73 |
| Width (µm) |  |  |
| Number | 25 | 25 |
| Mean | 9.51 | 9.57 |
| Standard deviation | 2.07 | 2.43 |
| Range | 4.78-15.05 | 6.21-16.08 |
| Eccentricity (Width/Length) |  |  |
| Number | 25 | 25 |
| Mean | 0.63 | 0.63 |
| Standard deviation | 0.14 | 0.13 |
| Range | 0.37-0.98 | 0.45-0.91 |
